# Supplementary material for: Thixotropic Supramolecular Pectin-Poly(Ethylene Glycol) Methacrylate (PEGMA) Hydrogels
Source: PubMed Central journal article supplement (PMC6432130; doi:10.3390/polym8110404), 2016-11-18
Supplement: polymers-08-00404-s001.pdf [file polymers-08-00404-s001.pdf]

# Supplementary Materials: Thixotropic Supramolecular Pectin-Poly(Ethylene Glycol) Methacrylate (PEGMA) Hydrogels

Siew Yin Chan, Wee Sim Choo, David James Young and Xian Jun Loh

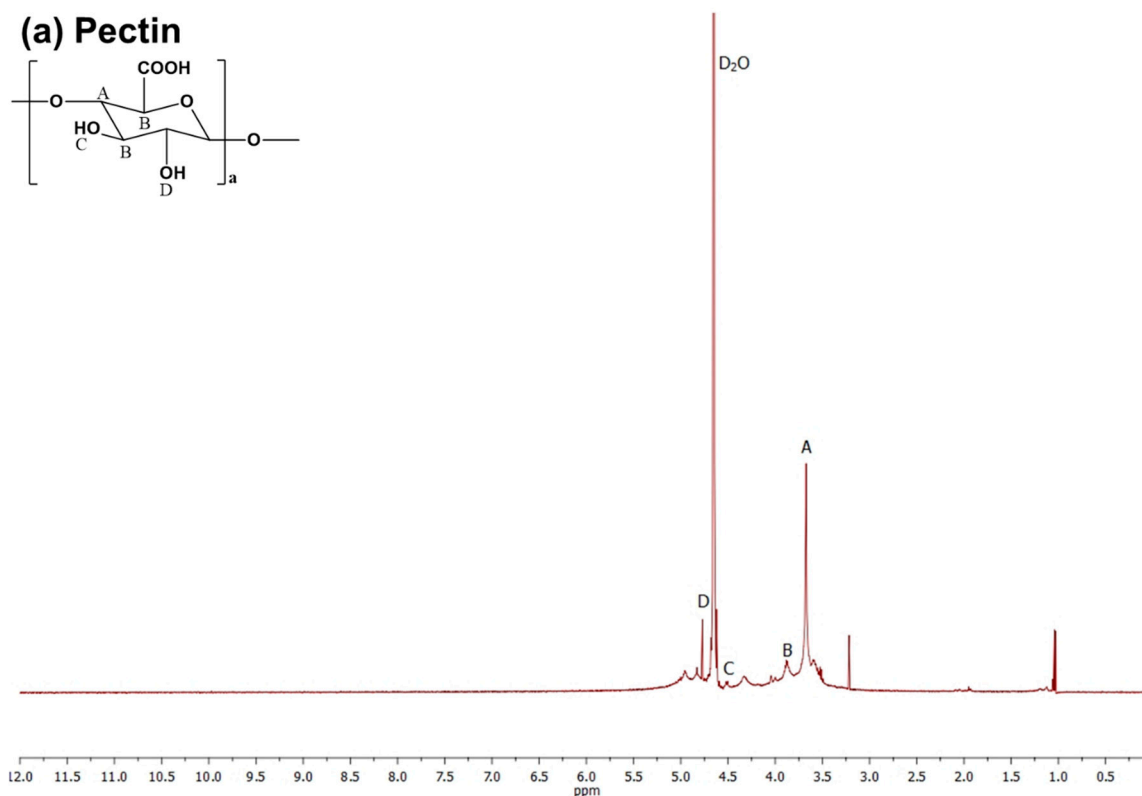

Figure S1. Cont.

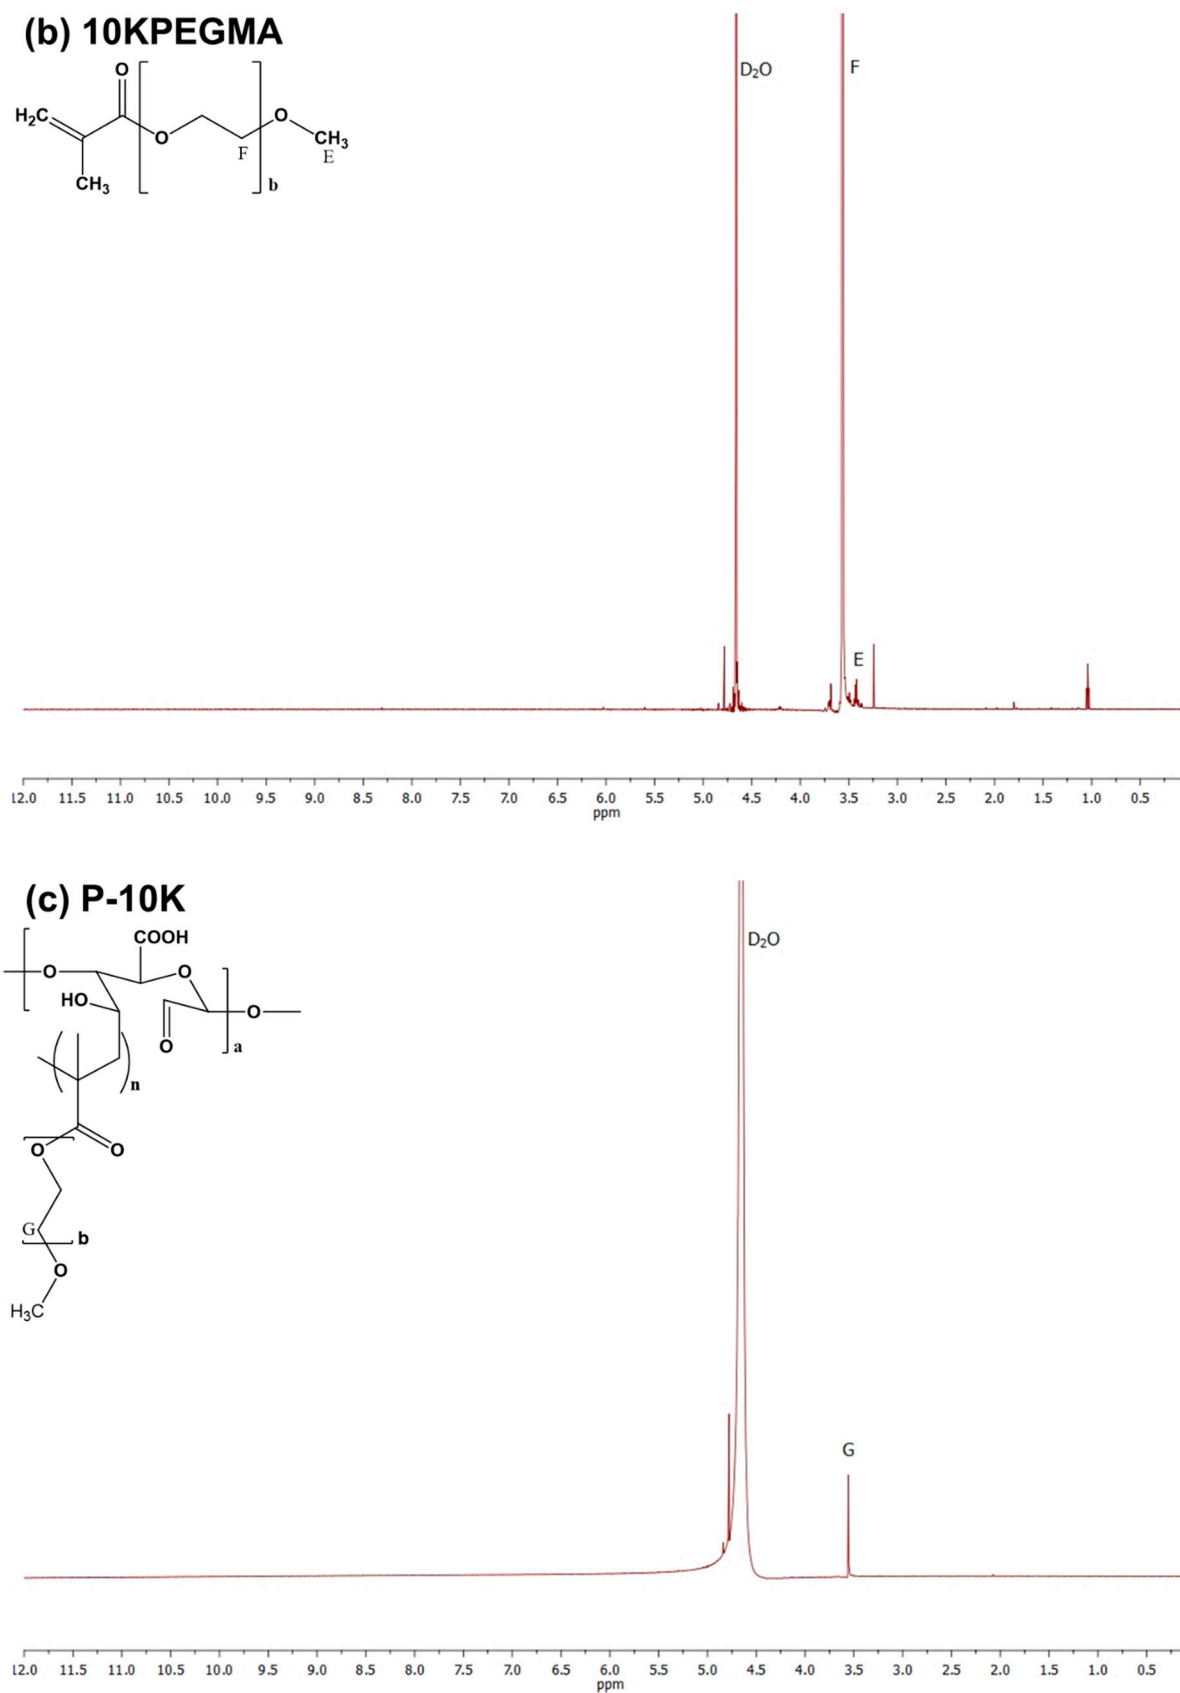

Figure S1. 500  $^1\text{H}$  NMR spectra of the precursors (pectin and 10KPEGMA) and copolymer P-10K.
